# Supplementary material
Source: PubMed Central journal article supplement (PMC8711643)

## SUPPLEMENTAL MATERIAL

### **Exposure to inorganic arsenic and its methylated metabolites alters metabolomics profiles in INS-1 832/13 insulinoma cells and isolated pancreatic islets**

*Yuan-Yuan Li<sup>1,2</sup>, Christelle Douillet<sup>2</sup>, Madelyn Huang<sup>3</sup>, Rowan Beck<sup>4</sup>, Susan Jenkins Sumner<sup>1,2,\*</sup>,  
Miroslav Styblo<sup>2,3,\*</sup>*

<sup>1</sup>Nutrition Research Institute, Department of Nutrition, University of North Carolina at Chapel Hill School of Public Health, Chapel Hill, NC 27599, USA

<sup>2</sup>Department of Nutrition, University of North Carolina Gillings School of Global Public Health, Chapel Hill, NC 27599, USA

<sup>3</sup>Curriculum in Toxicology and Environmental Medicine, School of Medicine, University of North Carolina at Chapel Hill, NC 27599, USA (Currently: National Toxicology Program, National Institute of Environmental Health Science, Research Triangle Park, North Carolina)

<sup>4</sup>Curriculum in Genetics and Molecular Biology, School of Medicine, University of North Carolina at Chapel Hill, NC 27599, USA

#### Corresponding authors:

Miroslav Stýblo, PhD  
Department of Nutrition, CB# 74612  
University of North Carolina at Chapel Hill  
Chapel Hill, NC 27599-7461, USA  
Phone: (919) 966-5721  
styblo@med.unc.edu

Susan Jenkins Sumner, PhD  
Nutrition Research Institute, Department of  
Nutrition, CB# 74612  
Chapel Hill, NC 27599-7461, USA  
Phone: 704-250-5066  
Susan\_sumner@unc.edu

**Supplementary Table 1a.** Metabolites perturbed in INS-1 832/13 cells exposed to iAs<sup>III</sup> as compared to control (Ctrl)

| Metabolite <sup>a</sup>                            | Ontology level <sup>b</sup> | INS-1 832/13 cells exposed to iAs <sup>III</sup> vs Ctrl |                              |                 |
|----------------------------------------------------|-----------------------------|----------------------------------------------------------|------------------------------|-----------------|
|                                                    |                             | VIP <sup>c</sup>                                         | <i>p</i> -value <sup>d</sup> | FC <sup>e</sup> |
| (46 signals, 18 with annotation or identification) |                             |                                                          |                              |                 |
| γ-Aminobutyric acid                                | OL1                         | 2.0                                                      | 0.002                        | -1.6            |
| Acetylcarnitine                                    | OL1                         | 4.0                                                      | <0.001                       | -1.8            |
| Succinic acid                                      | OL1                         | 2.2                                                      | 0.005                        | -1.5            |
| Betaine                                            | OL2a                        | 6.0                                                      | 0.046                        | -1.3            |
| Nicotinamide                                       | OL2a                        | 4.1                                                      | 0.026                        | -1.3            |
| Ribonolactone                                      | PDc                         | 1.2                                                      | <0.001                       | -1.8            |
| 2,3-Diketo-L-gulonate                              | PDc                         | 2.3                                                      | 0.001                        | -2.5            |
| D-Glucaro-1,4-lactone                              | PDc                         | 6.2                                                      | <0.001                       | -2.2            |
| Glycylproline                                      | PDc                         | 1.0                                                      | <0.001                       | -2.5            |
| Oxoglutarate                                       | PDc                         | 2.8                                                      | <0.001                       | -2.2            |
| Acetylacrylate                                     | PDc                         | 1.4                                                      | 0.005                        | -1.4            |
| 3b,17b-Dihydroxyetiocholanone                      | PDc                         | 1.0                                                      | 0.039                        | 2.1             |
| Behenoylglycine                                    | PDc                         | 1.2                                                      | 0.019                        | 1.5             |
| 10-Hydroxy-2,8-decadiene-4,6-diyonic acid          | PDd                         | 1.1                                                      | <0.001                       | 2.2             |
| 8-Hydroxyguanosine                                 | PDd                         | 1.8                                                      | <0.001                       | 2.7             |
| Thr-Phe-Arg                                        | PDd                         | 1.6                                                      | 0.006                        | -2.6            |

<sup>a</sup>Cut-off criteria for signals/metabolites differentiating the arsenical treated group from control are VIP $\geq$ 1.0 and  $p < 0.05$ . <sup>b</sup>Ontology levels: OL1, highly confident identification based on matching with In-house physical standard library (IPSL) via retention time (RT, with RT error $\leq$ 0.5), exact mass (MS, with mass error $<$ 5ppm), and tandem mass similarity (MS/MS, with similarity score $\geq$ 30); OL2a, confident identification based on matching with IPSL via MS and RT; OL2b, annotation for the isomer or derivatives of the compound listed but not the compound itself, based on matching with IPSL via MS and MS/MS; PDa, annotation based on matching with public database via MS and experimental MS/MS (could be the listed compound, or the isomer or derivatives of the listed compound); PDb, annotation based on matching with public database via MS and predict MS/MS; PDc, annotation for the listed compound based on matching with public database via MS and isotopic similarity or adducts; PDd annotation for listed compound based on matching with public database via MS. <sup>c</sup>VIP, Variable influence on projections to latent structures. <sup>d</sup>*p*-value determined by *t*-test. <sup>e</sup>FC, fold change, the ratio of intensity between the arsenical treated INS-1 832/13 cells vs control INS-1, based on the mean, indicates the direction and magnitude of change: positive FC indicates increase compared to control and negative FC indicates decrease compared to control.

**Supplementary Table 1b.** Metabolites perturbed in INS-1 832/13 cells 1exposed to MAs<sup>III</sup> as compared to control (Ctrl)

| Metabolite <sup>a</sup><br>(109 signals, 29 with annotation or identification) | Ontology level <sup>b</sup> | INS-1 832/13 cells exposed to<br>MAs <sup>III</sup> vs Ctrl |                              |                 |
|--------------------------------------------------------------------------------|-----------------------------|-------------------------------------------------------------|------------------------------|-----------------|
|                                                                                |                             | VIP <sup>c</sup>                                            | <i>p</i> -value <sup>d</sup> | FC <sup>e</sup> |
| Aspartic acid                                                                  | OL1                         | 4.1                                                         | <0.001                       | 3.6             |
| Glutamic acid                                                                  | OL1                         | 6.8                                                         | 0.023                        | -1.5            |
| Carnitine                                                                      | OL1                         | 1.9                                                         | 0.001                        | 1.3             |
| N-Methyl-L-glutamic acid                                                       | OL1                         | 5.9                                                         | <0.001                       | -2.5            |
| Acetylcarnitine                                                                | OL1                         | 3.3                                                         | <0.001                       | -1.6            |
| Succinic acid                                                                  | OL1                         | 1.7                                                         | 0.007                        | -1.4            |
| Cyclic adenosine monophosphate                                                 | OL1                         | 1.4                                                         | <0.001                       | 2.5             |
| O-Phosphorylethanolamine                                                       | OL2a                        | 1.1                                                         | 0.007                        | 3.0             |
| Raffinose                                                                      | OL2a                        | 1.0                                                         | 0.008                        | -1.6            |
| 2'-Deoxyadenosine 5'-monophosphate                                             | PDa                         | 1.1                                                         | <0.001                       | -3.5            |
| Glycerophosphocholine                                                          | PDb                         | 14.0                                                        | 0.015                        | 1.6             |
| Tyrosyl-Glutamine                                                              | PDb                         | 1.7                                                         | <0.001                       | -3.5            |
| Oxidized glutathione                                                           | PDb                         | 17.5                                                        | <0.001                       | 1.9             |
| 2- {[hydroxy(6-hydroxy-2H-1,3-benzodioxol-5-yl)methylidene]amino} acetic acid  | PDb                         | 1.0                                                         | <0.001                       | -2.9            |
| Succinyladenosine                                                              | PDb                         | 2.8                                                         | 0.002                        | -3.4            |
| N-Undecanoylglycine                                                            | PDc                         | 3.4                                                         | 0.019                        | 1.8             |
| Glycylproline                                                                  | PDc                         | 1.0                                                         | <0.001                       | -2.4            |
| β-Glycerophosphate                                                             | PDc                         | 1.5                                                         | <0.001                       | -7.9            |
| Ribonolactone                                                                  | PDc                         | 1.3                                                         | <0.001                       | -2.2            |
| 3-Oxoglutaric acid                                                             | PDc                         | 2.9                                                         | <0.001                       | -2.6            |
| 2,3-Diketo-L-gulonate                                                          | PDc                         | 2.3                                                         | <0.001                       | -2.9            |
| D-Glucaro-1,4-lactone                                                          | PDc                         | 6.4                                                         | <0.001                       | -2.7            |
| cis-Acetylacrylate                                                             | PDc                         | 1.3                                                         | 0.004                        | -1.3            |
| 3b,17b-Dihydroxyetiocholane                                                    | PDc                         | 2.1                                                         | 0.009                        | 6.3             |
| Thr-Leu                                                                        | PDc                         | 1.0                                                         | 0.004                        | -1.6            |
| 8-Hydroxyguanosine                                                             | PDd                         | 1.2                                                         | <0.001                       | 1.9             |
| Thr-Phe-Arg                                                                    | PDd                         | 1.8                                                         | 0.002                        | -4.2            |

<sup>a</sup>Cut-off criteria for signals/metabolites differentiating the arsenical treated group from control are VIP $\geq$ 1.0 and *p*<0.05. <sup>b</sup>Ontology levels: OL1, highly confident identification based on matching with In-house physical standard library (IPSL) via retention time (RT, with RT error $\leq$ 0.5), exact mass (MS, with mass error<5ppm), and tandem mass similarity (MS/MS, with similarity score $\geq$ 30); OL2a, confident identification based on matching with IPSL via MS and RT; OL2b, annotation for the isomer or derivatives of the compound listed but not the compound itself, based on matching with IPSL via MS and MS/MS; PDa, annotation based on matching with public database via MS and experimental MS/MS (could be the listed compound, or the isomer or derivatives of the listed compound); PDb, annotation based on matching with public database via MS and predict MS/MS; PDc, annotation for the listed compound based on matching with public database via MS and isotopic similarity or adducts; PDd annotation for listed compound based on matching with public database via MS. <sup>c</sup>VIP, Variable influence on projections to latent structures. <sup>d</sup>*p*-value determined by *t*-test. <sup>e</sup>FC, fold change, the ratio of intensity between the arsenical treated cells vs control cells, based on the mean, indicates the direction and magnitude of change: positive FC indicates increase compared to control and negative FC indicates decrease compared to control.

**Supplementary Table 1c.** Metabolites perturbed in INS-1 832/13 cells exposed to DMAs<sup>III</sup> as compared to control (Ctrl)

| Metabolite <sup>a</sup><br>(456 signals, 98 with annotation or identification) | Ontology level <sup>b</sup> | INS-1 832/13 cells exposed to<br>DMAs <sup>III</sup> vs Ctrl |                              |                 |
|--------------------------------------------------------------------------------|-----------------------------|--------------------------------------------------------------|------------------------------|-----------------|
|                                                                                |                             | VIP <sup>c</sup>                                             | <i>p</i> -value <sup>d</sup> | FC <sup>e</sup> |
| Spermine                                                                       | OL1                         | 2.3                                                          | 0.006                        | -1.7            |
| Spermidine                                                                     | OL1                         | 2.3                                                          | 0.017                        | -1.5            |
| Ornithine                                                                      | OL1                         | 1.8                                                          | 0.017                        | -1.8            |
| Phosphorylcholine                                                              | OL1                         | 3.2                                                          | 0.025                        | -1.9            |
| Alanine                                                                        | OL1                         | 1.5                                                          | <0.001                       | -2.2            |
| Threonine                                                                      | OL1                         | 1.2                                                          | 0.009                        | -1.3            |
| Glutamic acid                                                                  | OL1                         | 4.3                                                          | 0.030                        | -1.6            |
| γ-Aminobutyric acid                                                            | OL1                         | 1.1                                                          | 0.003                        | -1.6            |
| Creatine                                                                       | OL1                         | 12.1                                                         | <0.001                       | -3.0            |
| Proline                                                                        | OL1                         | 4.9                                                          | <0.001                       | -1.4            |
| Cytosine                                                                       | OL1                         | 1.7                                                          | <0.001                       | -3.0            |
| N-Methyl-L-glutamic acid                                                       | OL1                         | 4.1                                                          | <0.001                       | -7.3            |
| Guanine                                                                        | OL1                         | 1.7                                                          | <0.001                       | -2.4            |
| Acetylcarnitine                                                                | OL1                         | 2.0                                                          | <0.001                       | -1.8            |
| Glutathione reduced                                                            | OL1                         | 6.4                                                          | 0.007                        | -10.6           |
| Methionine                                                                     | OL1                         | 6.4                                                          | 0.024                        | -1.5            |
| Hypoxanthine                                                                   | OL1                         | 5.6                                                          | <0.001                       | -2.7            |
| Xanthine                                                                       | OL1                         | 1.7                                                          | 0.008                        | -1.7            |
| Succinic acid                                                                  | OL1                         | 1.4                                                          | <0.001                       | -1.8            |
| Tyrosine                                                                       | OL1                         | 8.6                                                          | 0.012                        | -1.7            |
| Uridine                                                                        | OL1                         | 2.8                                                          | <0.001                       | -3.8            |
| 4-Hydroxyphenylpyruvic acid                                                    | OL1                         | 1.1                                                          | 0.010                        | 1.4             |
| S-Adenosyl-L-homocysteine                                                      | OL1                         | 3.2                                                          | <0.001                       | -3.1            |
| Serotonin                                                                      | OL1                         | 1.5                                                          | 0.002                        | -1.9            |
| Adenosine                                                                      | OL1                         | 2.0                                                          | 0.001                        | 2.7             |
| Inosine                                                                        | OL1                         | 7.3                                                          | <0.001                       | -4.1            |
| Guanosine                                                                      | OL1                         | 2.9                                                          | <0.001                       | -3.8            |
| Phenylalanine                                                                  | OL1                         | 10.4                                                         | 0.030                        | -1.5            |
| Tryptophan                                                                     | OL1                         | 7.5                                                          | 0.012                        | -1.7            |
| Methylthioadenosine                                                            | OL1                         | 1.9                                                          | 0.001                        | -1.9            |
| Suberic acid                                                                   | OL1                         | 1.5                                                          | 0.009                        | 1.4             |
| Azelaic acid                                                                   | OL1                         | 2.3                                                          | 0.006                        | 1.4             |
| 5-Aminolevulinic acid                                                          | OL2a                        | 1.2                                                          | 0.042                        | -1.3            |
| Cytidine                                                                       | OL2a                        | 3.5                                                          | <0.001                       | -3.6            |
| Valine                                                                         | OL2a                        | 6.3                                                          | 0.007                        | -1.4            |
| Nicotinamide                                                                   | OL2a                        | 3.5                                                          | <0.001                       | -1.8            |
| Leucine                                                                        | OL2a                        | 1.3                                                          | 0.026                        | -1.8            |
| N-Acetylneuraminic acid                                                        | OL2b                        | 1.3                                                          | 0.007                        | -1.9            |

|                                                    |      |      |        |      |
|----------------------------------------------------|------|------|--------|------|
| Uracil                                             | OL2b | 1.6  | <0.001 | -3.1 |
| Sphingosine                                        | OL2b | 1.6  | 0.022  | 1.3  |
| Hypoxanthine                                       | OL2b | 5.9  | <0.001 | -3.7 |
| Guanine                                            | OL2b | 1.8  | <0.001 | -3.8 |
| 4-(2-Hydroxyethyl)piperazine-1-ethanesulfonic acid | PDa  | 11.2 | 0.042  | -1.4 |
| Uridine 5'-monophosphate                           | PDa  | 2.7  | 0.015  | -2.0 |
| Adenosine 5'-monophosphate                         | PDa  | 11.8 | 0.003  | -2.3 |
| Guanosine 5'-monophosphate                         | PDa  | 1.6  | <0.001 | -2.4 |
| .beta.-Nicotinamide adenine dinucleotide           | PDa  | 5.8  | <0.001 | -3.4 |
| Cyclic adenosine diphosphate ribose                | PDa  | 1.1  | <0.001 | -2.9 |
| 4-Hydroxybenzaldehyde                              | PDa  | 1.6  | 0.012  | -1.6 |
| 2-Phenylacetamide                                  | PDa  | 2.7  | 0.012  | -1.7 |
| Phenylpyruvic acid                                 | PDa  | 1.1  | 0.012  | -1.7 |
| N-Acetyl-D-glucosamine                             | PDa  | 2.5  | 0.008  | 1.4  |
| 3-Hydroxyoctadecanoic Acid                         | PDa  | 3.9  | 0.031  | 1.4  |
| Leu-Pro-Arg                                        | PDa  | 1.3  | 0.001  | -2.3 |
| 1H-Indole-4-carboxaldehyde                         | PDa  | 1.0  | 0.010  | -1.7 |
| Glycerophosphocholine                              | PDb  | 6.6  | 0.006  | -2.0 |
| 4-Hydroxycitrulline                                | PDb  | 1.5  | 0.040  | -3.7 |
| Inosine 2'-phosphate                               | PDb  | 4.5  | <0.001 | -4.4 |
| Tyrosyl-Glutamine                                  | PDb  | 1.0  | <0.001 | -8.3 |
| Beta-Citryl-L-glutamic acid                        | PDb  | 5.0  | <0.001 | -2.9 |
| Oxidized glutathione                               | PDb  | 7.9  | <0.001 | -3.4 |
| Armillaripin                                       | PDb  | 1.4  | <0.001 | 2.2  |
| 9,10,13-TriHOME                                    | PDb  | 1.5  | 0.005  | 1.5  |
| LysoPC(18:2(9Z,12Z))                               | PDb  | 1.0  | 0.022  | -6.9 |
| LysoPC(20:4(5Z,8Z,11Z,14Z))                        | PDb  | 1.5  | 0.049  | -2.7 |
| Succinyladenosine                                  | PDb  | 1.6  | <0.001 | -4.5 |
| 3-Oxoglutaric acid                                 | PDc  | 1.5  | <0.001 | -2.4 |
| 2,3-Diketo-L-gulonate                              | PDc  | 1.2  | <0.001 | -2.7 |
| D-Glucaro-1,4-lactone                              | PDc  | 3.6  | <0.001 | -2.7 |
| 6-Hydroxypentadecanedioic acid                     | PDc  | 1.7  | 0.002  | 1.6  |
| 9,12,13-TriHOME                                    | PDc  | 1.2  | 0.011  | 1.4  |
| O2'-4a-cyclic-tetrahydrobiopterin                  | PDc  | 2.3  | 0.005  | 1.5  |
| 2-amino-6-hydroxyhexanoic acid                     | PDc  | 2.9  | 0.004  | 1.6  |
| 3-Oxoctadecanoic acid                              | PDc  | 1.3  | 0.010  | 1.4  |
| xi-7-Hydroxyhexadecanedioic acid                   | PDc  | 1.0  | 0.008  | 1.5  |
| 2-Methoxyestrone                                   | PDc  | 2.0  | 0.001  | 2.0  |
| Ciliatine                                          | PDc  | 8.0  | 0.007  | 1.4  |
| O-Ureidohomoserine                                 | PDc  | 2.0  | 0.012  | 1.4  |
| Valyl-Threonine                                    | PDc  | 1.4  | 0.007  | 1.5  |
| 2,3-Dihydro-5-(3-hydroxypropanoyl)-1H-pyrrolizine  | PDc  | 1.6  | <0.001 | -2.7 |
| Pro-Trp-Lys                                        | PDc  | 2.2  | 0.003  | 1.7  |

|                                                                                                                                                                                              |     |     |        |       |
|----------------------------------------------------------------------------------------------------------------------------------------------------------------------------------------------|-----|-----|--------|-------|
| Galactose-beta-1,4-xylose                                                                                                                                                                    | PDc | 1.8 | 0.003  | -2.3  |
| Ricinoleic acid                                                                                                                                                                              | PDc | 2.1 | 0.014  | 1.4   |
| (3R,7R)-1,3,7-Octanetriol                                                                                                                                                                    | PDc | 2.0 | 0.045  | 1.3   |
| N-Undecanoylglycine                                                                                                                                                                          | PDc | 1.7 | 0.005  | 1.5   |
| 2-{{3-methyl-3-(4-methylpent-3-en-1-yl)oxiran-2-11-Oxoheptadecanoic acid                                                                                                                     | PDc | 1.4 | 0.003  | 1.5   |
| 7-Methylguanosine                                                                                                                                                                            | PDc | 1.5 | 0.004  | 1.8   |
| (2-Mercaptopropionylamino)acetic acid                                                                                                                                                        | PDd | 2.6 | <0.001 | -3.2  |
| Guanosine monophosphate                                                                                                                                                                      | PDd | 6.3 | <0.001 | -2.8  |
| (4-{{2-methoxy-4-(prop-2-en-1-yl)phenoxy}carbonyl}phenyl)oxidanesulfonic acid                                                                                                                | PDd | 2.0 | <0.001 | -2.8  |
| [(4-{{5,14-dihydroxy-3-methoxy-8,17-dioxatetracyclo[8.7.0.0 <sup>2,7</sup> .0 <sup>11,16</sup> ]heptadeca-1(10),2(7),3,5,11(16),12,14-heptaen-4-yl}}-2-methylbut-2-en-1-yl)oxy]sulfonic acid | PDd | 1.3 | <0.001 | 2.7   |
| 3-Hydroxydodecanoic acid                                                                                                                                                                     | PDd | 2.3 | 0.011  | 1.4   |
| Dihydrozeatin                                                                                                                                                                                | PDd | 1.2 | 0.003  | 1.5   |
| 1-Hexadecylamine                                                                                                                                                                             | PDd | 1.7 | 0.008  | 1.4   |
| HistidinyI-Methionine                                                                                                                                                                        | PDd | 2.0 | <0.001 | -4.0  |
| Thr-Phe-Arg                                                                                                                                                                                  | PDd | 1.1 | <0.001 | -11.0 |
| Cysteinyl-Histidine                                                                                                                                                                          | PDd | 1.0 | 0.007  | 1.4   |

<sup>a</sup>Cut-off criteria for signals/metabolites differentiating the arsenical treated group from control are  $VIP \geq 1.0$  and  $p < 0.05$ . <sup>b</sup>Ontology levels: OL1, highly confident identification based on matching with In-house physical standard library (IPSL) via retention time (RT, with  $RT \text{ error} \leq 0.5$ ), exact mass (MS, with  $\text{mass error} < 5$  ppm), and tandem mass similarity (MS/MS, with  $\text{similarity score} \geq 30$ ); OL2a, confident identification based on matching with IPSL via MS and RT; OL2b, annotation for the isomer or derivatives of the compound listed but not the compound itself, based on matching with IPSL via MS and MS/MS; PDa, annotation based on matching with public database via MS and experimental MS/MS (could be the listed compound, or the isomer or derivatives of the listed compound); PDb, annotation based on matching with public database via MS and predict MS/MS; PDc, annotation for the listed compound based on matching with public database via MS and isotopic similarity or adducts; PDd annotation for listed compound based on matching with public database via MS. <sup>c</sup>VIP, Variable influence on projections to latent structures. <sup>d</sup>p-value determined by *t*-test. <sup>e</sup>FC, fold change, the ratio of intensity between the arsenical treated cells vs control  $\beta$ -cells, based on the mean, indicates the direction and magnitude of change: positive FC indicates increase compared to control and negative FC indicates decrease compared to control.

**Supplementary Table 2a.** Metabolites perturbed in pancreatic islets exposed to iAs<sup>III</sup> as compared to control (Ctrl)

| Metabolite <sup>a</sup><br>(622 signals, 83 with annotation or identification) | Ontology level <sup>b</sup> | Islets exposed to iAs <sup>III</sup> vs Ctrl |                              |                 |
|--------------------------------------------------------------------------------|-----------------------------|----------------------------------------------|------------------------------|-----------------|
|                                                                                |                             | VIP <sup>c</sup>                             | <i>p</i> -value <sup>d</sup> | FC <sup>e</sup> |
| Taurine                                                                        | OL1                         | 1.5                                          | 0.27                         | -1.2            |
| L-Aspartic Acid                                                                | OL1                         | 1.1                                          | 0.51                         | -1.1            |
| L-Glutamic Acid                                                                | OL1                         | 1.5                                          | 0.93                         | -1.0            |
| S-Adenosylmethionine                                                           | OL1                         | 1.1                                          | 0.13                         | -1.5            |
| Sucrose                                                                        | OL1                         | 1.6                                          | 0.39                         | 2.3             |
| Hypoxanthine                                                                   | OL1                         | 1.5                                          | 0.94                         | -1.0            |
| DL-Leucine                                                                     | OL1                         | 2.1                                          | 0.96                         | -1.0            |
| Petroselinic acid                                                              | OL1                         | 1.3                                          | 0.78                         | 1.0             |
| Suberate                                                                       | OL1                         | 1.2                                          | 0.76                         | 1.0             |
| Azelate                                                                        | OL1                         | 2.0                                          | 0.64                         | 1.0             |
| Galactose                                                                      | OL2a                        | 5.2                                          | 0.76                         | -1.1            |
| Sorbitol                                                                       | OL2a                        | 1.0                                          | 0.24                         | 2.5             |
| Hypotaurine                                                                    | OL2a                        | 0.3                                          | 0.30                         | 3.9             |
| Orotic Acid                                                                    | OL2a                        | 0.2                                          | 0.02                         | -1.6            |
| L-Valine                                                                       | OL2a                        | 1.7                                          | 0.57                         | -1.1            |
| 12-Hydroxydodecanoic Acid                                                      | OL2b                        | 1.8                                          | 0.80                         | 1.0             |
| Dethiobiotin                                                                   | OL2b                        | 0.3                                          | 0.19                         | 2.1             |
| Suberate                                                                       | OL2b                        | 1.0                                          | 0.57                         | 1.0             |
| L-Tryptophanamide                                                              | OL2b                        | 0.4                                          | 0.47                         | 2.0             |
| N-Palmitoylglycine                                                             | PDa                         | 1.2                                          | 0.42                         | 2.6             |
| Uridine 5'-Monophosphate                                                       | PDa                         | 1.3                                          | 0.27                         | -1.2            |
| Thr-Pro                                                                        | PDa                         | 0.5                                          | 0.04                         | -1.2            |
| N-Acetyl-D-Glucosamine                                                         | PDa                         | 1.9                                          | 0.59                         | 1.0             |
| Lyso-PC(16:0)                                                                  | PDa                         | 1.0                                          | 0.71                         | 1.1             |
| Palmitamide                                                                    | PDa                         | 2.9                                          | 0.34                         | 1.4             |
| Uridine Diphosphate-N-Acetylglucosamine                                        | PDb                         | 1.0                                          | 0.22                         | -1.2            |
| 2-[(6-Carboxy-3,4,5-Trihydroxyoxan-2-Yl)Oxy]-3-Oxidized Glutathione            | PDb                         | 0.5                                          | 0.17                         | -4.4            |
| Oxidized Glutathione                                                           | PDb                         | 5.7                                          | 0.03                         | 1.3             |
| Lysophosphatidylcholine(20:4(8Z,11Z,14Z,17Z)/0:0)                              | PDb                         | 1.8                                          | 0.89                         | 1.0             |
| Lysophosphatidylcholine(22:6(4Z,7Z,10Z,13Z,16Z,19Z)/0:0)                       | PDb                         | 1.3                                          | 0.83                         | -1.1            |
| Linoleamide                                                                    | PDb                         | 1.7                                          | 0.68                         | 1.3             |
| 4-Hydroxydebrisoquine                                                          | PDb                         | 0.3                                          | 0.02                         | -1.3            |
| Mevalonic Acid                                                                 | PDb                         | 1.3                                          | 0.39                         | 4.4             |
| Androsterone Sulfate                                                           | PDb                         | 1.1                                          | 0.36                         | 2.0             |
| 11-Oxohexadecanoic Acid                                                        | PDc                         | 1.2                                          | 0.62                         | 1.0             |
| 3-Sulfopyruvic Acid                                                            | PDc                         | 3.6                                          | 0.60                         | 1.0             |
| Oxoglutarate                                                                   | PDc                         | 0.5                                          | 0.04                         | -2.2            |
| 4-(Glutamylamino) butanoate                                                    | PDc                         | 0.7                                          | 0.01                         | 1.6             |
| 6-Dimethylaminopurine                                                          | PDc                         | 0.6                                          | 0.26                         | 2.1             |

|                                                                                                                                                                  |     |     |       |      |
|------------------------------------------------------------------------------------------------------------------------------------------------------------------|-----|-----|-------|------|
| Isobutyryl-L-carnitine                                                                                                                                           | PDc | 0.8 | 0.34  | 6.9  |
| 4,8 Dimethylnonanoyl carnitine                                                                                                                                   | PDc | 1.1 | 0.48  | 2.2  |
| N-Lauroylglycine                                                                                                                                                 | PDc | 0.6 | 0.31  | 2.0  |
| PE(P-16:0e/0:0)                                                                                                                                                  | PDc | 0.2 | 0.56  | -2.6 |
| L-Octanoylcarnitine                                                                                                                                              | PDc | 0.6 | 0.25  | 2.3  |
| Palmitoylglycine                                                                                                                                                 | PDc | 2.7 | 0.48  | 2.5  |
| 5'-Deoxyadenosine                                                                                                                                                | PDc | 1.4 | 0.59  | 1.0  |
| 1,2-Dihexanoyl-sn-glycerol                                                                                                                                       | PDc | 1.0 | 0.80  | 1.0  |
| Indanone                                                                                                                                                         | PDc | 0.2 | 0.05  | 1.5  |
| N-Acetyl-b-glucosaminyllamine                                                                                                                                    | PDc | 1.5 | 0.74  | 1.0  |
| (2Z)-2-[(2-hydroxyphenyl)methylidene]heptanal                                                                                                                    | PDc | 0.3 | <0.01 | 1.3  |
| Palmitoleoyl Ethanolamide                                                                                                                                        | PDc | 6.9 | 0.40  | 2.9  |
| 4-(3,7-dimethylocta-2,6-dien-1-yl)benzene-1,2,3,5-tetrol                                                                                                         | PDc | 1.5 | 0.66  | -1.0 |
| Pro-Val-Arg                                                                                                                                                      | PDc | 2.3 | 0.33  | 14.2 |
| MG(0:0/i-12:0/0:0)                                                                                                                                               | PDc | 1.8 | 0.21  | 1.2  |
| 1,11-Undecanedicarboxylic acid                                                                                                                                   | PDc | 3.9 | 0.39  | 2.1  |
| 11-Hydroxyoctadecanoic acid                                                                                                                                      | PDc | 2.0 | 0.78  | 1.0  |
| 11beta-Hydroxy-3,20-dioxopregn-4-en-21-oic acid                                                                                                                  | PDc | 0.4 | 0.03  | 1.1  |
| 3-Sulfofpyruvic acid                                                                                                                                             | PDc | 1.9 | 0.70  | 1.0  |
| 3-Sulfofpyruvic acid                                                                                                                                             | PDc | 2.0 | 0.67  | 1.0  |
| Valyl-Threonine                                                                                                                                                  | PDc | 1.0 | 0.66  | 1.0  |
| Hydroxypropyl-Isoleucine                                                                                                                                         | PDc | 1.2 | 0.60  | 1.0  |
| gamma-Glutamylvaline                                                                                                                                             | PDc | 0.3 | 0.02  | -1.6 |
| N-Nonanoylglycine                                                                                                                                                | PDc | 0.3 | 0.41  | 5.5  |
| Alanyl-Tyrosine                                                                                                                                                  | PDc | 0.4 | 0.44  | 2.3  |
| Formyl-5-hydroxykynurenamine                                                                                                                                     | PDc | 0.3 | 0.35  | -3.3 |
| N-Decanoylglycine                                                                                                                                                | PDc | 0.6 | 0.46  | 2.7  |
| Isovalerylcarnitine                                                                                                                                              | PDc | 0.4 | 0.33  | 8.1  |
| Propionylcarnitine                                                                                                                                               | PDc | 0.3 | 0.26  | 2.5  |
| Tetrahydrobiopterin                                                                                                                                              | PDc | 0.3 | 0.18  | 2.3  |
| 3-Isopropylmalate                                                                                                                                                | PDc | 5.9 | 0.30  | -1.2 |
| DL-Indole-3-lactic acid                                                                                                                                          | PDc | 5.4 | 0.05  | -1.4 |
| N2-(3-Carboxy-2-hydroxy-1-oxopropyl)arginine                                                                                                                     | PDd | 0.4 | <0.01 | -2.2 |
| Biotinyl-5'-AMP                                                                                                                                                  | PDd | 0.4 | 0.01  | 1.6  |
| L-Octanoylcarnitine                                                                                                                                              | PDd | 0.4 | 0.48  | 2.3  |
| MG(0:0/20:2(11Z,14Z)/0:0)                                                                                                                                        | PDd | 0.2 | 0.52  | -3.1 |
| LysoPC(P-18:0)                                                                                                                                                   | PDd | 0.6 | 0.21  | -3.7 |
| 7-Hydroxy-6-methyl-8-ribityl lumazine                                                                                                                            | PDd | 1.3 | 0.98  | -1.0 |
| Cholestane-3,7,12,25-tetrol-3-glucuronide                                                                                                                        | PDd | 1.5 | 0.26  | 1.1  |
| Estrone sulfate                                                                                                                                                  | PDd | 0.5 | 0.26  | 2.3  |
| [(4-{5,14-dihydroxy-3-methoxy-8,17-dioxatetracyclo[8.7.0.0 <sup>2,7</sup> .0 <sup>11,16</sup> ]}heptadeca-1(10),2(7),3,5,11(16),12,14-heptaen-4-yl}-2-methylbut- | PDd | 1.0 | 0.03  | -1.3 |



|                                                                                                                         |     |     |      |      |
|-------------------------------------------------------------------------------------------------------------------------|-----|-----|------|------|
| 6-[(17,19-Dioxo-5,7,9,20-tetraoxahexacyclo[11.7.0.02,10.03,8.04,6.014,18]icosa-1,10,12,14(18)-tetraen-12-yl)oxy]-3,4,5- | PDd | 0.7 | 0.02 | -1.4 |
| 4-Hydroxynonenal glutathione                                                                                            | PDd | 0.5 | 0.09 | 2.1  |
| Pivaloylcarnitine                                                                                                       | PDd | 0.3 | 0.33 | 2.8  |

<sup>a</sup>Cut-off criteria for signals/metabolites differentiating the arsenical treated group from control are  $VIP \geq 1.0$  or  $p < 0.05$  or  $|FC| > 2.0$  (highlighted in red). <sup>b</sup>Ontology levels: OL1, highly confident identification based on matching with In-house physical standard library (IPSL) via retention time (RT, with RT error  $\leq |0.5|$ ), exact mass (MS, with mass error  $< 5$  ppm), and tandem mass similarity (MS/MS, with similarity score  $\geq 30$ ); OL2a, confident identification based on matching with IPSL via MS and RT; OL2b, annotation for the isomer or derivatives of the compound listed but not the compound itself, based on matching with IPSL via MS and MS/MS; PDa, annotation based on matching with public database via MS and experimental MS/MS (could be the listed compound, or the isomer or derivatives of the listed compound); PDb, annotation based on matching with public database via MS and predict MS/MS; PDC, annotation for the listed compound based on matching with public database via MS and isotopic similarity or adducts; PDd annotation for listed compound based on matching with public database via MS. <sup>c</sup>VIP, Variable influence on projections to latent structures. <sup>d</sup>p-value determined by *t*-test. <sup>e</sup>FC, fold change, the ratio of intensity between the arsenical treated islets vs control islets, based on the mean, indicates the direction and magnitude of change: positive FC indicates increase compared to control and negative FC indicates decrease compared to control.

**Supplementary Table 2b.** Metabolites perturbed in pancreatic islets exposed to MAs<sup>III</sup> as compared to control (Ctrl)

| Metabolite <sup>a</sup>                                                | Ontology level <sup>b</sup> | Islets exposed to MAs <sup>III</sup> vs Ctrl |                              |                 |
|------------------------------------------------------------------------|-----------------------------|----------------------------------------------|------------------------------|-----------------|
|                                                                        |                             | VIP <sup>c</sup>                             | <i>p</i> -value <sup>d</sup> | FC <sup>e</sup> |
| (457 signals, 65 with annotation or identification)                    |                             |                                              |                              |                 |
| L-Glutamic acid                                                        | OL1                         | 2.0                                          | 0.92                         | -1.0            |
| S-Adenosylmethionine                                                   | OL1                         | 1.8                                          | 0.06                         | -1.9            |
| L-Citrulline                                                           | OL1                         | 0.7                                          | 0.18                         | -2.0            |
| O-Acetylcarnitine                                                      | OL1                         | 1.3                                          | 0.39                         | -1.2            |
| Uric acid                                                              | OL1                         | 0.6                                          | 0.53                         | 2.3             |
| Ophthalmate                                                            | OL1                         | 0.4                                          | 0.03                         | 1.5             |
| L-Tyrosine                                                             | OL1                         | 1.5                                          | 0.19                         | -1.1            |
| Petroselinic acid                                                      | OL1                         | 1.6                                          | 0.87                         | 1.0             |
| Glycerol-myristate                                                     | OL1                         | 1.2                                          | 0.69                         | 1.0             |
| Methylthioadenosine                                                    | OL1                         | 4.4                                          | 0.02                         | -1.6            |
| Suberate                                                               | OL1                         | 1.3                                          | 0.78                         | -1.0            |
| Betaine                                                                | OL2a                        | 0.8                                          | 0.27                         | -2.1            |
| L-Lysine                                                               | OL2a                        | 0.3                                          | 0.39                         | 2.4             |
| 4-Imidazoleacrylic acid                                                | OL2a                        | 2.6                                          | 0.12                         | -2.2            |
| 12-Hydroxydodecanoic acid                                              | OL2b                        | 2.4                                          | 0.99                         | 1.0             |
| Adenine                                                                | OL2b                        | 0.8                                          | 0.03                         | -1.2            |
| Suberate                                                               | OL2b                        | 1.4                                          | 0.68                         | 1.0             |
| N-Acetyl-D-glucosamine                                                 | PDa                         | 2.2                                          | 0.80                         | 1.0             |
| 2-[(6-carboxy-3,4,5-trihydroxyoxan-2-yl)oxy]-3-hydroxybutanedioic acid | PDb                         | 0.6                                          | 0.13                         | -6.8            |
| Oxidized glutathione                                                   | PDb                         | 4.8                                          | 0.31                         | -1.2            |
| LysoPE(20:4(8Z,11Z,14Z,17Z)/0:0)                                       | PDb                         | 2.4                                          | 0.85                         | -1.1            |
| LysoPE(22:6(4Z,7Z,10Z,13Z,16Z,19Z)/0:0)                                | PDb                         | 1.7                                          | 0.71                         | -1.1            |
| 3b,16a-Dihydroxyandrost-4-ene-3,17-dione sulfate                       | PDb                         | 1.1                                          | 0.26                         | 2.1             |
| 11-Oxoheptadecanoic acid                                               | PDc                         | 1.5                                          | 0.67                         | 1.0             |
| 19-Oxoandrost-4-ene-3,17-dione                                         | PDc                         | 3.7                                          | 0.47                         | 1.1             |
| 3-Sulfoacetic acid                                                     | PDc                         | 4.3                                          | 0.72                         | 1.0             |
| 7-Keto-8-aminopelargonic acid                                          | PDc                         | 4.1                                          | 0.53                         | 1.5             |
| 3-(1-Pyrrolidinyl)-2-butanone                                          | PDc                         | 1.0                                          | 0.53                         | 1.4             |
| 20-Carboxy-leukotriene B4                                              | PDc                         | 0.3                                          | 0.05                         | 1.2             |
| 5'-Deoxyadenosine                                                      | PDc                         | 1.5                                          | 0.84                         | 1.0             |
| 1,2-Dihexanoyl-sn-glycerol                                             | PDc                         | 1.1                                          | 0.88                         | -1.0            |
| Indanone                                                               | PDc                         | 0.2                                          | 0.02                         | 1.4             |
| Octadecanedioic acid                                                   | PDc                         | 2.2                                          | 0.68                         | -1.1            |
| N-Acetyl-b-glucosaminylamine                                           | PDc                         | 1.7                                          | 0.99                         | -1.0            |
| 13,14-Dihydro PGF-1a                                                   | PDc                         | 2.2                                          | 0.34                         | -1.2            |
| 4-(3,7-dimethylocta-2,6-dien-1-yl)benzene-1,2,3,5-tetrol               | PDc                         | 2.1                                          | 0.61                         | 1.0             |
| (R)-3-Hydroxy-hexadecanoic acid                                        | PDc                         | 1.1                                          | 0.55                         | 1.0             |
| 1,11-Undecanedicarboxylic acid                                         | PDc                         | 3.2                                          | 0.03                         | -1.4            |
| Alanyl-Threonine                                                       | PDc                         | 1.9                                          | 0.49                         | 1.1             |
| 11-Hydroxyoctadecanoic acid                                            | PDc                         | 2.6                                          | 0.80                         | 1.0             |
| 1-pentadecanoyl-glycero-3-phosphate                                    | PDc                         | 1.0                                          | 0.65                         | 1.0             |
| 3-Sulfoacetic acid                                                     | PDc                         | 2.2                                          | 0.88                         | 1.0             |
| 3-Sulfoacetic acid                                                     | PDc                         | 2.2                                          | 0.94                         | 1.0             |

|                                                                                                                                                                                             |     |     |      |      |
|---------------------------------------------------------------------------------------------------------------------------------------------------------------------------------------------|-----|-----|------|------|
| LysoSM(d18:1)                                                                                                                                                                               | PDc | 0.3 | 0.03 | 1.2  |
| Valyl-Threonine                                                                                                                                                                             | PDc | 1.2 | 0.90 | 1.0  |
| Hydroxypropyl-Isoleucine                                                                                                                                                                    | PDc | 1.4 | 0.90 | 1.0  |
| 2-Methylbutylamine                                                                                                                                                                          | PDc | 1.0 | 0.99 | 1.0  |
| N-methylphenylalanine                                                                                                                                                                       | PDc | 0.9 | 0.24 | -2.9 |
| Proline betaine                                                                                                                                                                             | PDc | 0.2 | 0.30 | -2.2 |
| gamma-Glutamylvaline                                                                                                                                                                        | PDc | 0.4 | 0.04 | -1.5 |
| N-Nonanoylglycine                                                                                                                                                                           | PDc | 0.1 | 0.35 | -6.3 |
| cis-4-Hydroxycyclohexylacetic acid                                                                                                                                                          | PDc | 1.2 | 0.80 | 1.0  |
| 8-Hydroxyguanosine                                                                                                                                                                          | PDc | 0.9 | 0.02 | -1.6 |
| Alanyl-Tyrosine                                                                                                                                                                             | PDc | 0.3 | 0.01 | -1.5 |
| Formyl-5-hydroxykynurenamine                                                                                                                                                                | PDc | 0.5 | 0.36 | -3.2 |
| N-Decanoylglycine                                                                                                                                                                           | PDc | 0.2 | 0.34 | -2.5 |
| D-Glucuronic acid 1-phosphate                                                                                                                                                               | PDc | 1.1 | 0.08 | -1.4 |
| DL-Indole-3-lactic acid                                                                                                                                                                     | PDc | 6.0 | 0.32 | -1.2 |
| (±)-3-Hydroxynonanoic acid                                                                                                                                                                  | PDd | 0.4 | 0.01 | 1.2  |
| LysoPC(P-18:0)                                                                                                                                                                              | PDd | 0.8 | 0.24 | -3.3 |
| .alpha.-Estradiol                                                                                                                                                                           | PDd | 0.5 | 0.01 | 1.3  |
| Cholestane-3,7,12,25-tetrol-3-glucuronide                                                                                                                                                   | PDd | 1.2 | 0.69 | 1.0  |
| Palmitoylglycine                                                                                                                                                                            | PDd | 0.2 | 0.03 | -1.4 |
| gamma-Glutamylisoleucine                                                                                                                                                                    | PDd | 1.6 | 0.02 | -1.6 |
| [(4-{5,14-dihydroxy-3-methoxy-8,17-dioxatetracyclo[8.7.0.0 <sup>2,7</sup> .0 <sup>11,16</sup> ]}heptadeca-1(10),2(7),3,5,11(16),12,14-heptaen-4-yl)-2-methylbut-2-en-1-yl]oxy]sulfonic acid | PDd | 1.2 | 0.36 | -1.1 |

<sup>a</sup>Cut-off criteria for signals/metabolites differentiating the arsenical treated group from control are VIP $\geq$ 1.0 or  $p < 0.05$  or |FC| $>$ 2.0 (highlighted in red). <sup>b</sup>Ontology levels: OL1, highly confident identification based on matching with In-house physical standard library (IPSL) via retention time (RT, with RT error $\leq$ |0.5|), exact mass (MS, with mass error $<$ 5ppm), and tandem mass similarity (MS/MS, with similarity score $\geq$ 30); OL2a, confident identification based on matching with IPSL via MS and RT; OL2b, annotation for the isomer or derivatives of the compound listed but not the compound itself, based on matching with IPSL via MS and MS/MS; PDa, annotation based on matching with public database via MS and experimental MS/MS (could be the listed compound, or the isomer or derivatives of the listed compound); PDb, annotation based on matching with public database via MS and predict MS/MS; PDc, annotation for the listed compound based on matching with public database via MS and isotopic similarity or adducts; PDd annotation for listed compound based on matching with public database via MS. <sup>c</sup>VIP, Variable influence on projections to latent structures. <sup>d</sup>p-value determined by *t*-test. <sup>e</sup>FC, fold change, the ratio of intensity between the arsenical treated islets vs control  $\beta$ -cells, based on the mean, indicates the direction and magnitude of change: positive FC indicates increase compared to control and negative FC indicates decrease compared to control.

**Supplementary Table 2c.** Metabolites perturbed in pancreatic islets exposed to DMAs<sup>III</sup> as compared to control (Ctrl)

| Metabolites <sup>a</sup>                            | Ontology level | Islets exposed to DMAs <sup>III</sup> vs Ctrl |           |       |
|-----------------------------------------------------|----------------|-----------------------------------------------|-----------|-------|
|                                                     |                | VIP*                                          | p-value** | FC*** |
| (593 signals, 72 with annotation or identification) |                |                                               |           |       |
| 3-(4-HYDROXYPHENYL)PYRUVATE                         | OL1            | 1.0                                           | 0.59      | 1.0   |
| Uric acid                                           | OL1            | 0.3                                           | 0.28      | -2.3  |
| L-Citrulline                                        | OL1            | 0.5                                           | 0.13      | -2.4  |
| Suberate                                            | OL1            | 1.2                                           | 0.95      | 1.0   |
| Ornithine                                           | OL1            | 0.2                                           | 0.05      | -1.3  |
| Glycerol-Myristate                                  | OL1            | 2.0                                           | 0.27      | -1.1  |
| L-Glutathione reduced                               | OL1            | 2.2                                           | 0.32      | -2.1  |
| Petroselinate                                       | OL1            | 1.5                                           | 0.85      | 1.0   |
| Ophthalmate                                         | OL1            | 0.3                                           | 0.03      | 1.4   |
| O-Acetylcarnitine                                   | OL1            | 1.3                                           | 0.28      | -1.3  |
| 2,6-Diaminopimelic acid                             | OL2a           | 0.5                                           | 0.02      | 1.2   |
| 4-Imidazoleacrylic acid                             | OL2a           | 2.3                                           | 0.07      | -2.7  |
| Caprylate                                           | OL2b           | 1.1                                           | 0.16      | 2.1   |
| Suberate                                            | OL2b           | 1.3                                           | 0.48      | 1.0   |
| Sphinganine                                         | OL2b           | 2.0                                           | 0.35      | 1.1   |
| Adenosine 5'-monophosphate                          | PDa            | 6.0                                           | 0.83      | -1.0  |
| 4-(2-Hydroxyethyl)piperazine-1-ethanesulfonic       | PDa            | 9.5                                           | 0.25      | -1.2  |
| N-Acetyl-D-glucosamine                              | PDa            | 2.3                                           | 0.59      | 1.0   |
| Glycylprolylhydroxyproline                          | PDb            | 1.4                                           | 0.10      | -1.3  |
| Oxidized glutathione                                | PDb            | 4.7                                           | 0.09      | -1.3  |
| PIP2(16:0/16:1(9Z))                                 | PDb            | 1.3                                           | 0.27      | -1.2  |
| LysoPE(20:4(8Z,11Z,14Z,17Z)/0:0)                    | PDb            | 2.2                                           | 0.52      | -1.2  |
| LysoPE(22:6(4Z,7Z,10Z,13Z,16Z,19Z)/0:0)             | PDb            | 1.6                                           | 0.46      | -1.2  |
| Myristoylglycine                                    | PDb            | 0.4                                           | 0.09      | 2.5   |
| 2-[(6-carboxy-3,4,5-trihydroxyoxan-2-yl)oxy]-3-     | PDb            | 0.6                                           | 0.12      | -8.1  |
| 1,2-Dihexanoyl-sn-glycerol                          | PDc            | 1.2                                           | 0.72      | 1.0   |
| 7-Keto-8-aminopelargonic acid                       | PDc            | 7.8                                           | 0.13      | 2.9   |
| Tetrahydrobiopterin                                 | PDc            | 0.4                                           | 0.09      | 3.8   |
| cis-4-Hydroxycyclohexylacetic acid                  | PDc            | 1.1                                           | 0.70      | 1.0   |
| 6-Dimethylaminopurine                               | PDc            | 0.8                                           | 0.26      | 2.9   |
| Isovalerylcarnitine                                 | PDc            | 0.1                                           | 0.51      | 2.3   |
| N-Acetyl-b-glucosaminylamine                        | PDc            | 1.7                                           | 0.75      | 1.0   |
| 5'-Deoxyadenosine                                   | PDc            | 1.8                                           | 0.51      | 1.0   |
| 4a-Carbinolamine tetrahydrobiopterin                | PDc            | 3.8                                           | 0.24      | -1.2  |
| CDP-glucose                                         | PDc            | 0.5                                           | 0.05      | -1.5  |
| 3-Sulfoxyruvic acid                                 | PDc            | 4.8                                           | 0.55      | 1.0   |
| 3-Sulfoxyruvic acid                                 | PDc            | 2.2                                           | 0.73      | 1.0   |
| 3-Sulfoxyruvic acid                                 | PDc            | 2.3                                           | 0.73      | 1.0   |
| 9,12,13-TriHOME                                     | PDc            | 1.0                                           | 0.55      | 1.0   |

|                                                                                                                                  |     |     |      |      |
|----------------------------------------------------------------------------------------------------------------------------------|-----|-----|------|------|
| Proline betaine                                                                                                                  | PDc | 0.2 | 0.30 | -2.2 |
| 19-Oxoandro-4-ene-3,17-dione                                                                                                     | PDc | 1.9 | 0.84 | -1.0 |
| Palmitoyl glucuronide                                                                                                            | PDc | 0.4 | 0.04 | 1.1  |
| Imidazole acetol-phosphate                                                                                                       | PDc | 0.3 | 0.02 | 1.2  |
| Formyl-5-hydroxykynurenamine                                                                                                     | PDc | 0.3 | 0.37 | -3.0 |
| Myristoylglycine                                                                                                                 | PDc | 0.5 | 0.17 | 2.4  |
| N-Decanoylglycine                                                                                                                | PDc | 5.9 | 0.12 | 2.5  |
| N-Nonanoylglycine                                                                                                                | PDc | 5.3 | 0.12 | 2.8  |
| N-Nonanoylglycine                                                                                                                | PDc | 0.8 | 0.15 | 2.3  |
| N-Undecanoylglycine                                                                                                              | PDc | 6.5 | 0.13 | 1.6  |
| Tridecanoylglycine                                                                                                               | PDc | 1.8 | 0.15 | 2.0  |
| Tridecanoylglycine                                                                                                               | PDc | 0.5 | 0.02 | -1.5 |
| Alanyl-Threonine                                                                                                                 | PDc | 1.0 | 0.93 | -1.0 |
| Hydroxypropyl-Isoleucine                                                                                                         | PDc | 1.4 | 0.65 | 1.0  |
| Histidyl-Histidine                                                                                                               | PDc | 0.4 | 0.05 | 1.1  |
| Valyl-Threonine                                                                                                                  | PDc | 1.2 | 0.65 | 1.0  |
| N-methylphenylalanine                                                                                                            | PDc | 1.9 | 0.38 | 4.7  |
| 11-Oxohexadecanoic acid                                                                                                          | PDc | 1.3 | 0.55 | 1.0  |
| 2-Carboxy-4-dodecanolide                                                                                                         | PDc | 0.3 | 0.03 | -1.2 |
| (+)-15,16-Dihydroxyoctadecanoic acid                                                                                             | PDc | 1.1 | 0.10 | 1.1  |
| 2-Methylbutylamine                                                                                                               | PDc | 1.1 | 0.71 | 1.0  |
| 3-(1-Pyrrolidinyl)-2-butanone                                                                                                    | PDc | 1.9 | 0.13 | 2.7  |
| 11-Hydroxyoctadecanoic acid                                                                                                      | PDc | 2.5 | 0.67 | 1.0  |
| 4-(3,7-dimethylocta-2,6-dien-1-yl)benzene-1,2,3,5-                                                                               | PDc | 2.4 | 0.59 | 1.0  |
| (2E)-1-(4-hydroxy-3-methoxyphenyl)-3-                                                                                            | PDc | 1.1 | 0.10 | -1.5 |
| Phenol, 4-(2-aminoethyl)-                                                                                                        | PDc | 0.8 | 0.33 | 2.8  |
| 3a,16b-Dihydroxyandrosthenone                                                                                                    | PDd | 1.8 | 0.11 | 2.6  |
| PC(14:1(9Z)/24:0)                                                                                                                | PDd | 0.8 | 0.08 | -3.0 |
| Cholestane-3,7,12,25-tetrol-3-glucuronide                                                                                        | PDd | 1.3 | 0.53 | 1.0  |
| Ascorbyl stearate                                                                                                                | PDd | 0.7 | 0.02 | -2.0 |
| Angiotensin I                                                                                                                    | PDd | 2.2 | 0.03 | -1.9 |
| MG(12:0/0/0/0)                                                                                                                   | PDd | 0.2 | 0.03 | 1.1  |
| 2-amino-4-({1-[(carboxymethyl)-C-<br>hydroxycarbonimidoyl]-2-[(2-hydroxy-5-oxo-1,7-<br>diphenylhept-3-en-1-yl)sulfanyl]ethyl}-C- | PDd | 0.5 | 0.02 | -1.4 |

<sup>a</sup>Cut-off criteria for signals/metabolites differentiating the arsenical treated group from control are VIP $\geq$ 1.0 or  $p < 0.05$  or |FC| $>$ 2.0 (highlighted in red). <sup>b</sup>Ontology levels: OL1, highly confident identification based on matching with In-house physical standard library (IPSL) via retention time (RT, with RT error $\leq$ |0.5|), exact mass (MS, with mass error $<$ 5ppm), and tandem mass similarity (MS/MS, with similarity score $\geq$ 30); OL2a, confident identification based on matching with IPSL via MS and RT; OL2b, annotation for the isomer or derivatives of the compound listed but not the compound itself, based on matching with IPSL via MS and MS/MS; PDa, annotation based on matching with public database via MS and experimental MS/MS (could be the listed compound, or the isomer or derivatives of the listed compound); PDb, annotation based on matching with public database via MS and predict MS/MS; PDc, annotation for the listed compound based on matching with public database via MS and isotopic similarity or adducts; PDd annotation for listed compound based on matching with public database via MS. <sup>c</sup>VIP,

Variable influence on projections to latent structures. <sup>d</sup>p-value determined by *t*-test. <sup>e</sup>FC, fold change, the ratio of intensity between the arsenical treated INS-1vs control INS-1, based on the mean, indicates the direction and magnitude of change: positive FC indicates increase compared to control and negative FC indicates decrease compared to control.

**Supplemental Table 3.** Metabolites perturbed in both INS-1 832/13 cells and pancreatic islets exposed to arsenicals as compared to the corresponding unexposed controls (Ctrl)

| Code <sup>a</sup> | Metabolite <sup>b</sup>        | FC in INS-1 832/13cells <sup>c</sup> |                            |                            | FC in Islets <sup>c</sup>  |                            |                             |
|-------------------|--------------------------------|--------------------------------------|----------------------------|----------------------------|----------------------------|----------------------------|-----------------------------|
|                   |                                | iAs <sup>III</sup> vs Ctrl           | MAs <sup>III</sup> vs Ctrl | DMAs <sup>III</sup> vs Con | iAs <sup>III</sup> vs Ctrl | MAs <sup>III</sup> vs Ctrl | DMAs <sup>III</sup> vs Ctrl |
| A                 | Acetylcarnitine                | -1.8                                 | -1.6                       | -1.8                       |                            | -1.2                       | -1.3                        |
| A                 | Glutamic acid                  |                                      | -1.5                       | -1.6                       | -1.0                       |                            |                             |
| A                 | Aspartic acid                  |                                      | 3.6                        |                            | -1.1                       |                            |                             |
| A                 | Glutathione reduced            |                                      |                            | -10.6                      |                            |                            | -2.1                        |
| A                 | Hypoxanthine                   |                                      |                            | -2.7                       | -1.0                       |                            |                             |
| A                 | Methylthioadenosine            |                                      |                            | -1.9                       |                            | -1.6                       |                             |
| A                 | Leucine                        |                                      |                            | -1.8                       | -1.0                       |                            |                             |
| A                 | Ornithine                      |                                      |                            | -1.8                       |                            |                            | -1.3                        |
| A                 | Valine                         |                                      |                            | -1.4                       | -1.1                       |                            |                             |
| A                 | 4-Hydroxyphenylpyruvic acid    |                                      |                            | 1.4                        |                            |                            | 1.0                         |
| A                 | Azelaic acid                   |                                      |                            | 1.4                        | 1.0                        |                            |                             |
| A                 | Suberic acid                   |                                      |                            | 1.4                        | 1.0                        | -1.0                       | 1.0                         |
| A                 | Betaine                        | -1.3                                 |                            |                            |                            | -2.1                       |                             |
| B                 | 5-Aminolevulinic acid          |                                      |                            | -1.3                       |                            |                            |                             |
| B                 | Adenosine                      |                                      |                            | 2.7                        |                            |                            |                             |
| B                 | Alanine                        |                                      |                            | -2.2                       |                            |                            |                             |
| B                 | Creatine                       |                                      |                            | -3                         |                            |                            |                             |
| B                 | Cytidine                       |                                      |                            | -3.6                       |                            |                            |                             |
| B                 | Cytosine                       |                                      |                            | -3                         |                            |                            |                             |
| B                 | γ-Aminobutyric acid            |                                      |                            | -1.6                       |                            |                            |                             |
| B                 | Guanine                        |                                      |                            | -2.4                       |                            |                            |                             |
| B                 | Guanosine                      |                                      |                            | -3.8                       |                            |                            |                             |
| B                 | Inosine                        |                                      |                            | -4.1                       |                            |                            |                             |
| B                 | Methionine                     |                                      |                            | -1.5                       |                            |                            |                             |
| B                 | Nicotinamide                   |                                      |                            | -1.8                       |                            |                            |                             |
| B                 | N-Methyl-L-glutamic acid       |                                      |                            | -7.3                       |                            |                            |                             |
| B                 | Phenylalanine                  |                                      |                            | -1.5                       |                            |                            |                             |
| B                 | Phosphorylcholine              |                                      |                            | -1.9                       |                            |                            |                             |
| B                 | Proline                        |                                      |                            | -1.4                       |                            |                            |                             |
| B                 | S-Adenosyl-L-homocysteine      |                                      |                            | -3.1                       |                            |                            |                             |
| B                 | Serotonin                      |                                      |                            | -1.9                       |                            |                            |                             |
| B                 | Spermidine                     |                                      |                            | -1.5                       |                            |                            |                             |
| B                 | Spermine                       |                                      |                            | -1.7                       |                            |                            |                             |
| B                 | Succinic acid                  |                                      |                            | -1.8                       |                            |                            |                             |
| B                 | Threonine                      |                                      |                            | -1.3                       |                            |                            |                             |
| B                 | Tryptophan                     |                                      |                            | -1.7                       |                            |                            |                             |
| B                 | Tyrosine                       |                                      |                            | -1.7                       |                            |                            |                             |
| B                 | Uridine                        |                                      |                            | -3.8                       |                            |                            |                             |
| B                 | Xanthine                       |                                      |                            | -1.7                       |                            |                            |                             |
| B                 | Carnitine                      |                                      | 1.3                        |                            |                            |                            |                             |
| B                 | Cyclic adenosine monophosphate |                                      | 2.5                        |                            |                            |                            |                             |
| B                 | N-Methyl-L-glutamic acid       |                                      | -2.5                       |                            |                            |                            |                             |
| B                 | O-Phosphorylethanolamine       |                                      | 3.0                        |                            |                            |                            |                             |
| B                 | Raffinose                      |                                      | -1.6                       |                            |                            |                            |                             |
| B                 | Succinic acid                  |                                      | -1.4                       |                            |                            |                            |                             |

|   |                         |      |      |      |      |      |
|---|-------------------------|------|------|------|------|------|
| B | γ-Aminobutyric acid     | -1.6 |      |      |      |      |
| B | Nicotinamide            | -1.3 |      |      |      |      |
| B | Succinic acid           | -1.5 |      |      |      |      |
| C | 2,6-Diaminopimelic acid |      |      |      |      | 1.2  |
| C | 4-Imidazoleacrylic acid |      |      | -2.0 | -2.7 |      |
| C | Citrulline              |      |      | -2.0 | -2.4 |      |
| C | Glycerol monomyristate  |      |      |      |      | -1.1 |
| C | Ophthalmic acid         |      |      |      |      | 1.4  |
| C | Petroselinic acid       |      | 1.0  | 1.0  | 1.0  |      |
| C | Uric acid               |      |      | 2.3  | -2.3 |      |
| C | 4-Imidazoleacrylic acid |      |      | -2.2 |      |      |
| C | Citrulline              |      |      | -2.0 |      |      |
| C | Glutamic acid           |      |      | -1.0 |      |      |
| C | Glycerol monomyristate  |      |      | 1.0  | -1.1 |      |
| C | Lysine                  |      |      | 2.4  |      |      |
| C | Ophthalmic acid         |      |      | 1.5  | 1.4  |      |
| C | Petroselinic acid       |      | 1.0  | 1.0  | 1.0  |      |
| C | S-Adenosyl-L-methionine |      | -1.5 | -1.9 |      |      |
| C | Tyrosine                |      |      | -1.1 |      |      |
| C | Uric acid               |      |      | 2.3  |      |      |
| C | Galactose               |      | -1.1 |      |      |      |
| C | Hypotaurine             |      | 3.9  |      |      |      |
| C | Lyso-PC(16:0)           |      | 1.1  |      |      |      |
| C | N-Palmitoylglycine      |      | 2.6  |      |      |      |
| C | Orotic acid             |      | -1.6 |      |      |      |
| C | Palmitamide             |      | 1.4  |      |      |      |
| C | Petroselinic acid       |      | 1.0  |      |      |      |
| C | S-Adenosyl-L-methionine |      | -1.5 |      |      |      |
| C | Sorbitol                |      | 2.5  |      |      |      |
| C | Sucrose                 |      | 2.3  |      |      |      |
| C | Taurine                 |      | -1.2 |      |      |      |
| C | Thr-Pro                 |      | -1.2 |      |      |      |

<sup>a</sup>The capital letters (A, B, C) correspond to the sections in Venn diagram in Figure 7. <sup>b</sup>The criteria for identification of differentially altered metabolites were  $VIP \geq 1.0$  and  $p < 0.05$  for INS-1 832/13 cells and  $VIP \geq 1.0$  or  $p < 0.05$  or  $|FC| > 2.0$  for the islets. <sup>c</sup>FC, fold change, the ratio of intensity between the arsenical-treated vs control INS-1 832/13 cells or islets, based on the mean, indicates the direction and magnitude of the metabolites impacted by arsenical treatments; positive FC indicates increase compared to control (highlighted in red) and negative FC indicates decrease compared to control (highlighted in blue). Lack of FC value (gray area) indicates that the metabolite did not satisfy the above criteria.



**Supplemental Figure 1:** Relative concentrations of metabolites in glucose-amino acid pathways in INS-1 832/13 -cells exposed to iAs<sup>III</sup> (orange), MAs<sup>III</sup> (gray) or DMAs<sup>III</sup> (yellow), and in untreated control cells (blue); \* metabolite concentration in the exposed cells is significantly different ( $p < 0.05$ ) from that in control cells. Median (—), mean (x), 25<sup>th</sup> and 75<sup>th</sup> percentile (box), and individual values (○), including outliers (●) are shown; outliers are defined as values  $< Q1 - 1.5 \times IQR$  (bottom vertical line) or values  $> Q3 + 1.5 \times IQR$  (upper vertical line).

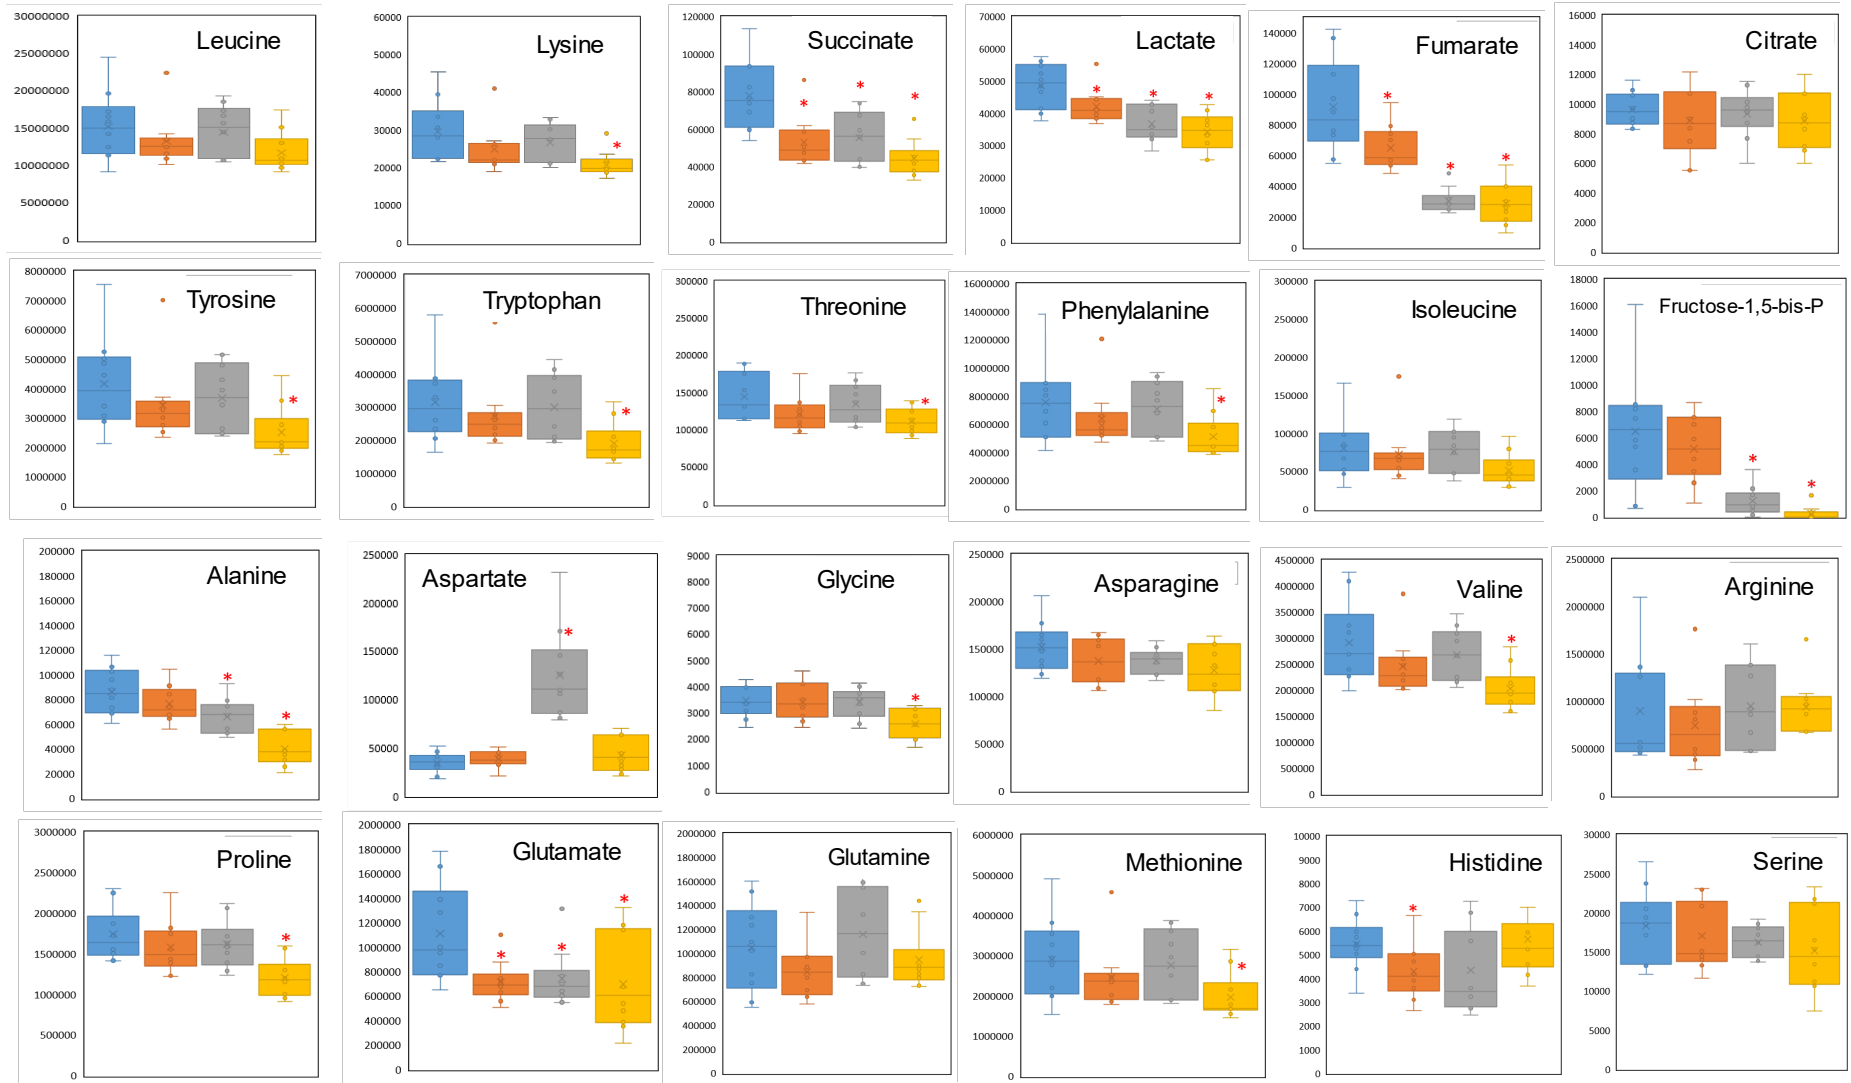

**Supplemental Figure 2:** Relative concentrations of carnitine and acylcarnitines in INS-1 832/13 cells exposed to iAs<sup>III</sup> (orange), MAs<sup>III</sup> (gray) or DMAs<sup>III</sup> (yellow), and in untreated control cells (blue); \*metabolite concentration in the exposed cells is significantly different ( $p < 0.05$ ) from that in control cells. Median (—), mean (x), 25<sup>th</sup> and 75<sup>th</sup> percentile (box), and individual values (○), including outliers (●) are shown; outliers are defined as values  $< Q1 - 1.5 \times IQR$  (bottom vertical line) or values  $> Q3 + 1.5 \times IQR$  (upper vertical line).

### Endogenous carnitine synthesis

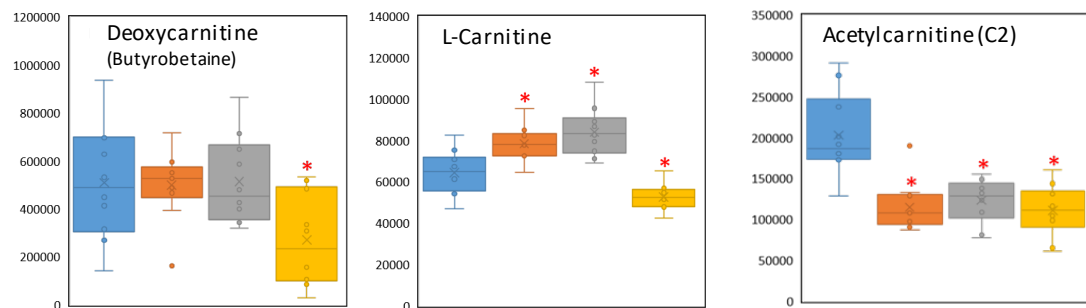

### Short-chain acylcarnitines.

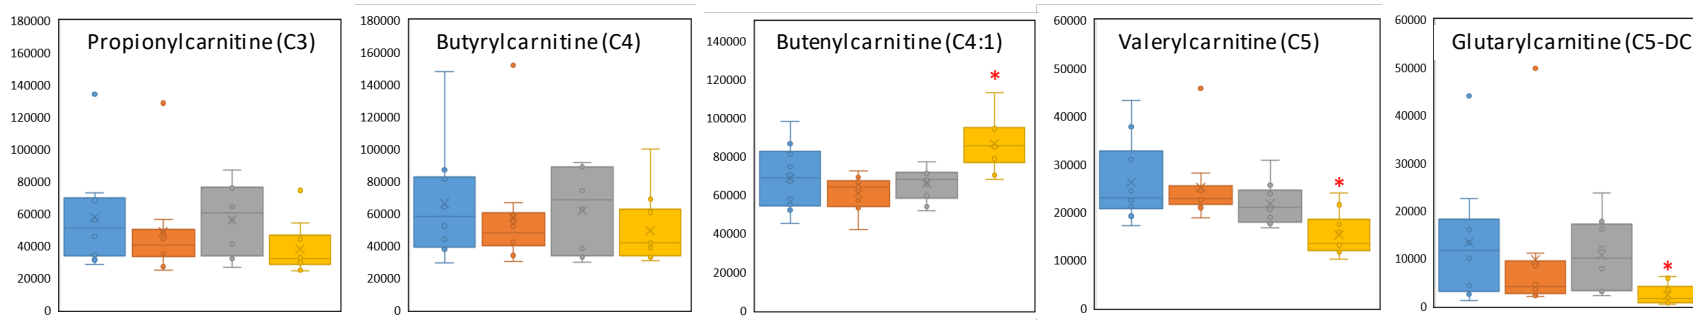

### Long and middle-chain acylcarnitines.

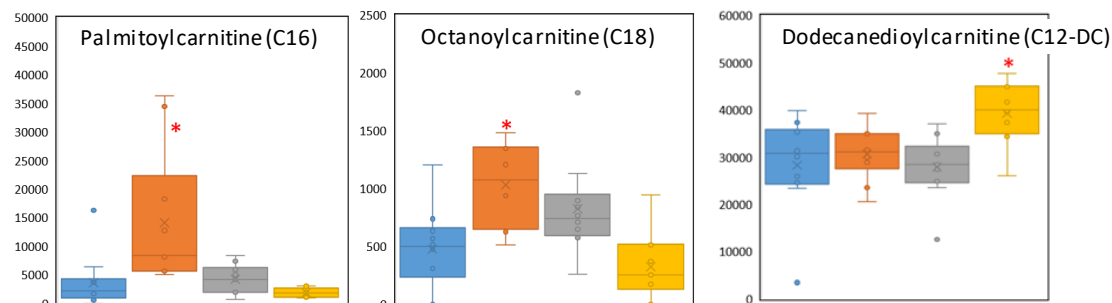

Supplement: NIHMS1583769-supplement-204_2020_2729_MOESM1_ESM.pdf [file NIHMS1583769-supplement-204_2020_2729_MOESM1_ESM.pdf]
